# Supplementary material for: Everolimus affects vasculogenic mimicry in renal carcinoma resistant to sunitinib
Source: PubMed Central journal article supplement (PMC5122404; doi:10.18632/oncotarget.9542), 2016-05-21
Supplement: oncotarget-07-38467-s001.pdf [file oncotarget-07-38467-s001.pdf]

# Everolimus affects vasculogenic mimicry in renal carcinoma resistant to sunitinib

## Supplementary Materials

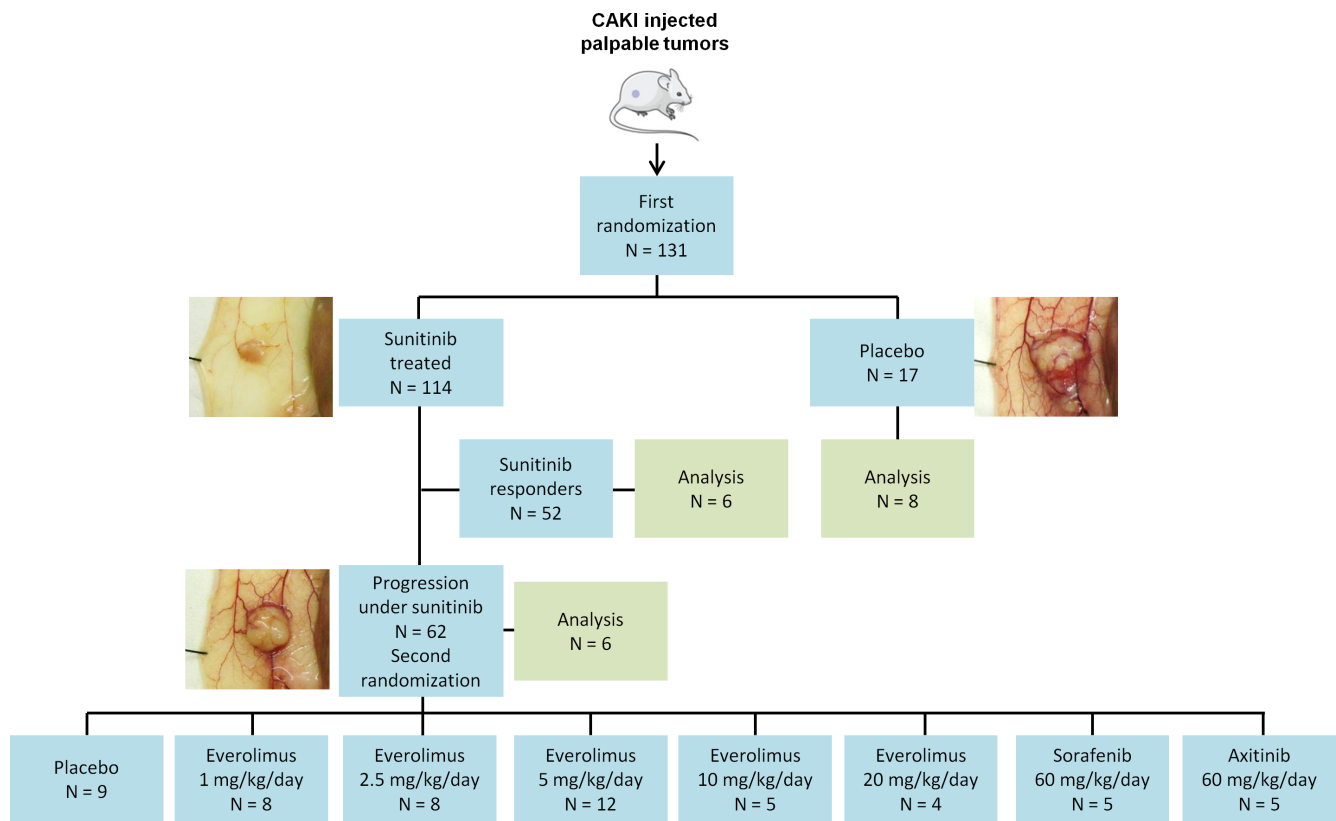

**Supplementary Figure S1: *In vivo* study design in CAKI-1 xenografts and representative pictures of tumors from mice receiving placebo or responding and progressing under sunitinib treatment.**

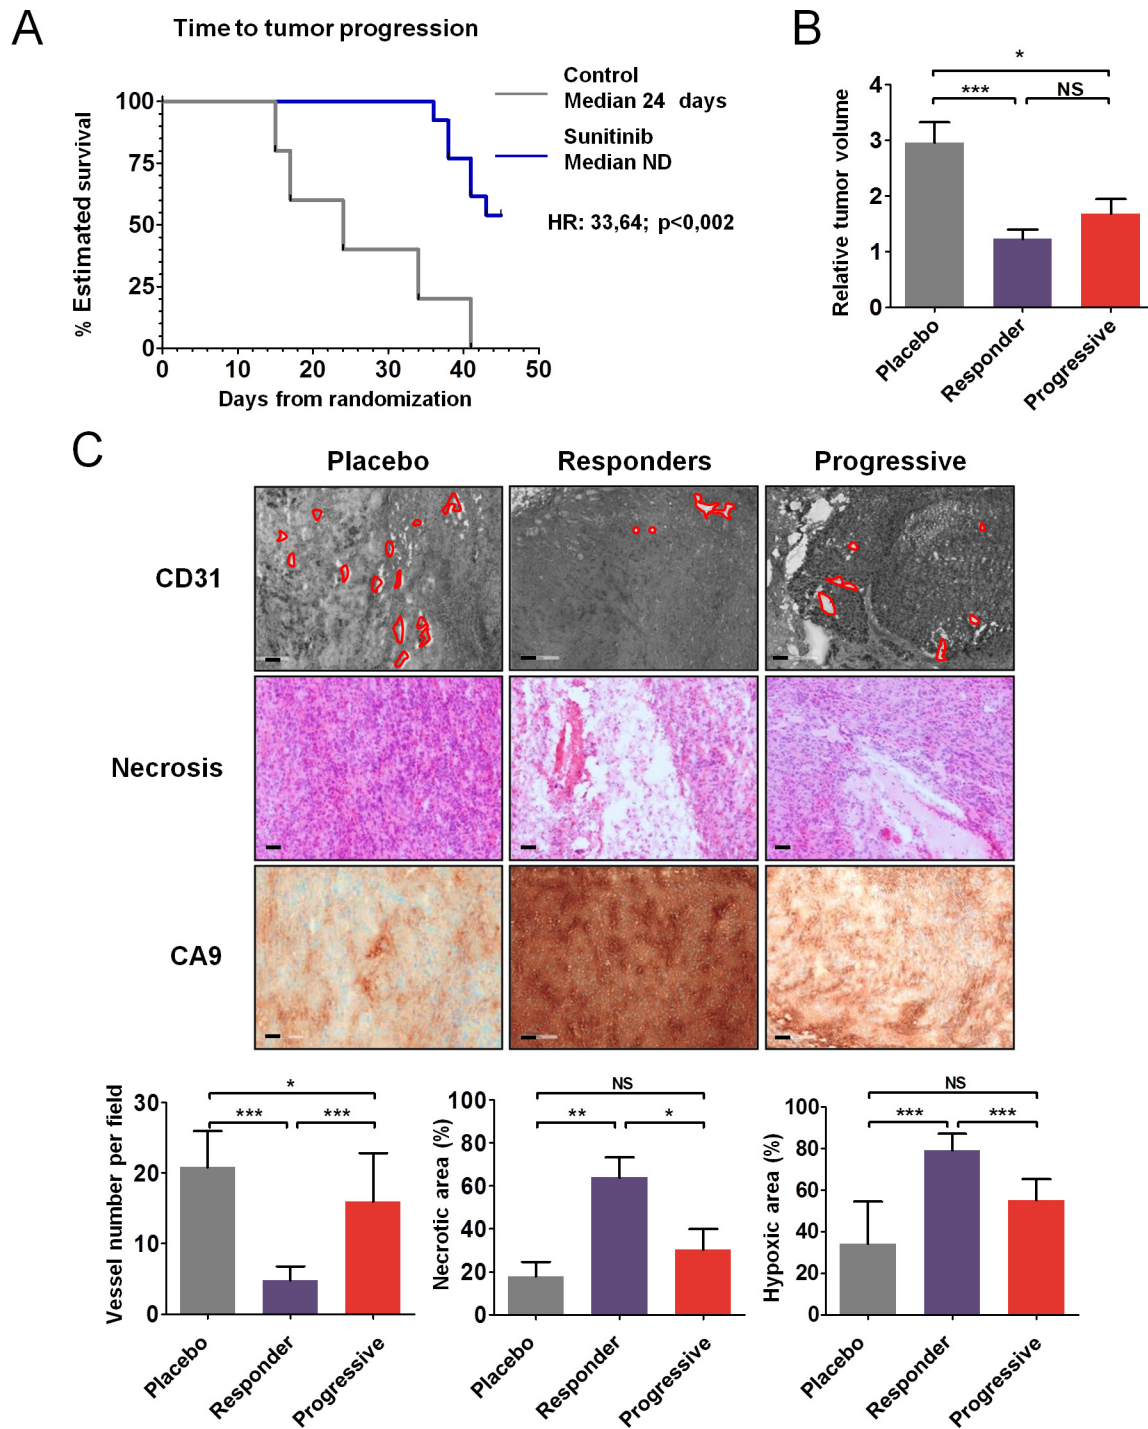

**Supplementary Figure S2: Antitumor and antiangiogenic effects of sunitinib in 786-0 RCC xenografts.** (A) Time to tumor progression (TTP) using Kaplan Meier estimate from X mice TTP data. (B) Relative tumor volume according to T0. Data are pooled from 5–7 animals per group. Bars indicate the mean  $\pm$  SEM. (C) Representative tumors from the placebo, responder, and progressive groups and analysis of vessel number, necrosis, and hypoxia detected by CD31, HE, and CA9 staining, respectively. The dashed region indicated the necrotic (N) area. Bars, 100  $\mu$ m. (Below) Quantitative analysis of CD31, HE, and CA9 staining. Data are pooled from 4–7 animals per group. Bars indicate the mean  $\pm$  SEM. (B and C) *P*-values were calculated using unpaired Student's *t* tests: \**P* < 0.05, \*\**P* < 0.01, \*\*\**P* < 0.001, NS, *P* < 0.05.

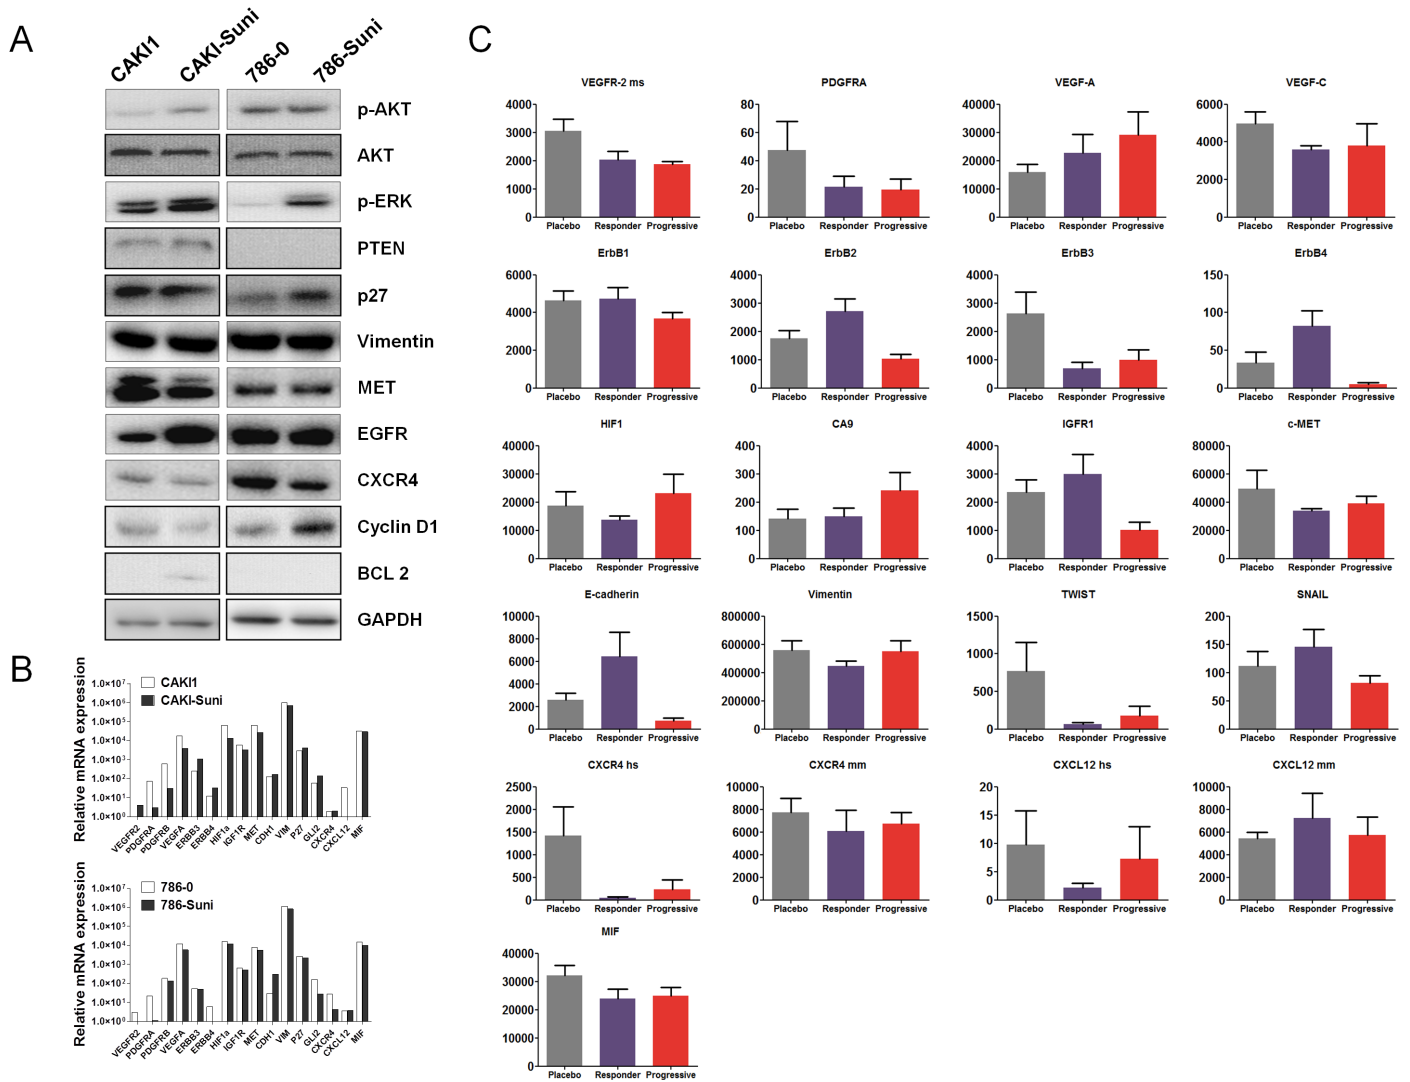

**Supplementary Figure S3: *In vitro* characterisation of acquired resistance to sunitinib in RCC cells.** (A) Protein expression by western blot of p-AKT, p-ERK1/2, AKT, PTEN, p27, Vimentin, MET, EGFR, CXCR4, Cyclin D1, BCL-2 and GAPDH in parental and resistant cell lines. (B and C) Quantitative analysis of selected gene expression using qRT-PCR in CAK11, CAK1-Suni, 786-0 and 786-Suni cell lines (B) and in tumors from the placebo, and sunitinib-treated groups from CAK1-1 xenografted tumors (C). Bars indicate the mean  $\pm$  SEM of three independent experiments or data pooled from 6–8 animals per group.

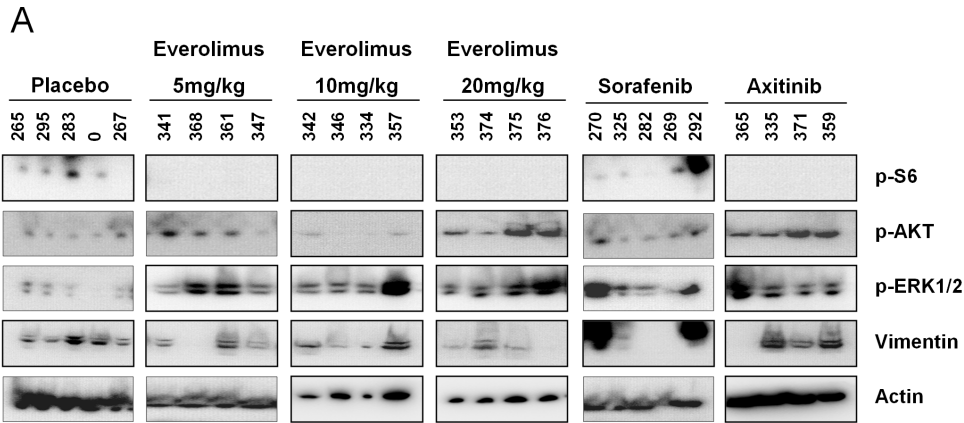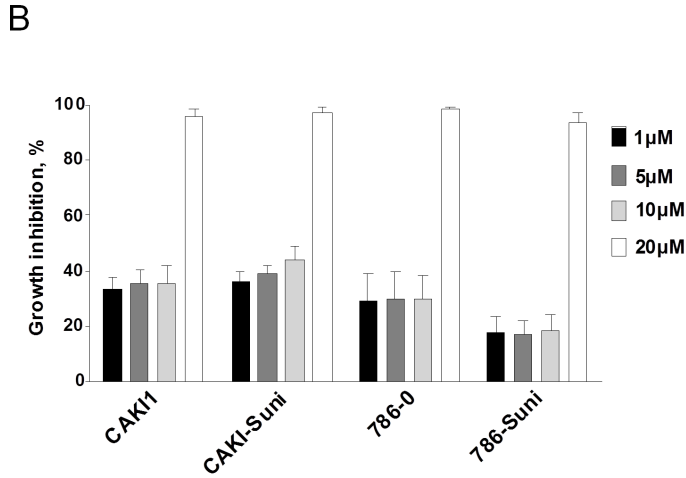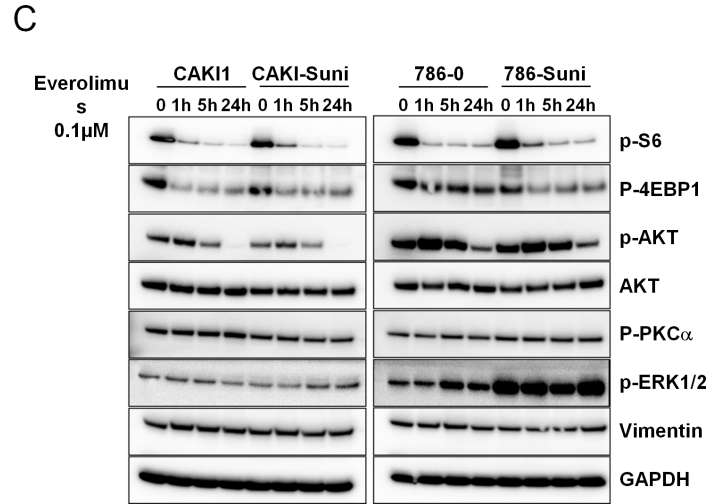

**Supplementary Figure S4: *In vivo* and *in vitro* effects of everolimus on sunitinib-resistant RCC models.** (A) Protein expression by western blot of p-S6, p-AKT, p-ERK1/2, Vimentin and Actin in sunitinib-resistant xenografts after second-line treatment with everolimus (5, 10, or 20 mg/kg), sorafenib (60 mg/kg), or axitinib (60 mg/kg). (B) Antiproliferative effects of 1, 5, 10 and 20  $\mu$ M everolimus on CAKI1, CAKI-Suni, 786-0 and 786-Suni cell lines *in vitro*. Bars indicate the mean  $\pm$  SEM of three independent experiments. (C) Protein expression by western blot of several genes in CAKI-1, CAKI-Suni, 786-0, and 786-Suni cells after 1-, 5-, and 24-hour exposure to 0.1  $\mu$ M everolimus.

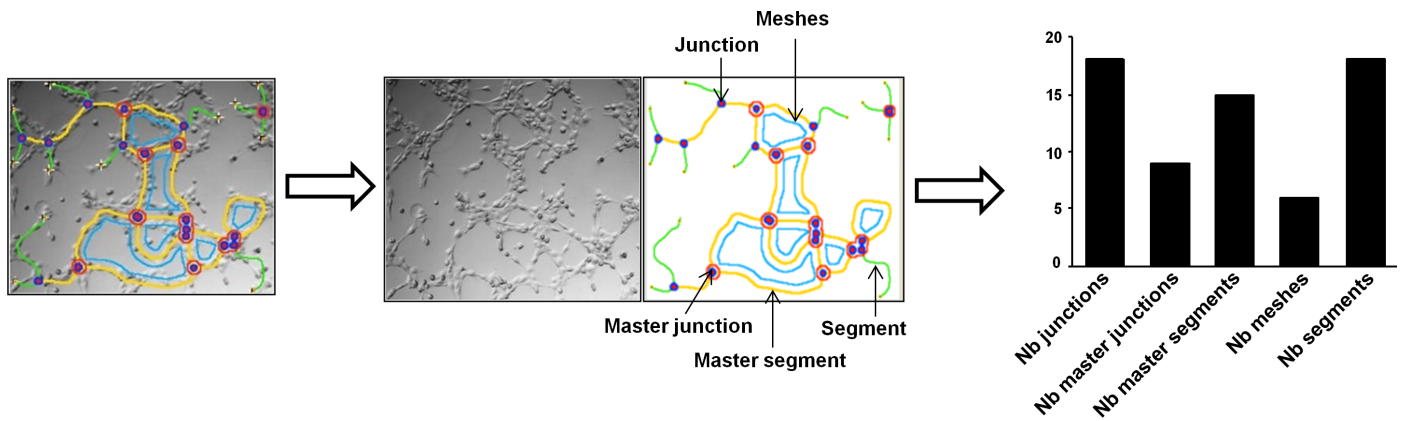

Supplementary Figure S5: Schematic representation of vasculogenic mimicry analysis *in vitro*.

Supplementary Table S1: Clinical & pathological characteristics of patients

| Clinical & pathological characteristics                   | N = 24                           |
|-----------------------------------------------------------|----------------------------------|
| Age (median)                                              | 55 years (range: 45–80)          |
| <b>Gender</b>                                             |                                  |
| Female                                                    | 3                                |
| Male                                                      | 21                               |
| <b>Tumor type</b>                                         |                                  |
| Clear cell RCC                                            | 24                               |
| Grade 2/3/4                                               | 5/15/4                           |
| <b>Initial treatment</b>                                  | 24                               |
| Nephrectomy                                               | 22                               |
| Sunitinib neo-adj. followed by nephrectomy                | 1                                |
| Radiotherapy followed by nephrectomy                      | 1                                |
| Peri-operative Sunitinib                                  | 3                                |
| <b>Delays between diagnosis and sunitinib treatment</b>   | median = 1.5 years (range: 0–12) |
| < 1 year                                                  | 10                               |
| 1–3 years                                                 | 7                                |
| > 3 years                                                 | 7                                |
| <b>Treatment at relapse</b>                               | 24                               |
| Sunitinib                                                 | 24                               |
| <b>Following next line treatments (excluding surgery)</b> |                                  |
| Sunitinib                                                 | 17                               |
| INFa+sunitinib                                            | 1                                |
| Sorafenib                                                 | 2                                |
| mTOR inhibitor                                            | 9                                |

**Supplementary Table S2: Tumoral CD31 staining in clear cell renal cell carcinoma patients**

| <b>Patient #</b> | <b>Positive <i>versus</i> negative tumoral CD31 staining</b> | <b>Vessels associated with positive CD31 staining (%)</b> |
|------------------|--------------------------------------------------------------|-----------------------------------------------------------|
| Pt11706          | positive                                                     | 20                                                        |
| Pt11608          | negative                                                     | 0                                                         |
| Pt13127          | positive                                                     | 80                                                        |
| Pt00451          | positive                                                     | 50                                                        |
| Pt03159          | positive                                                     | 60                                                        |
| Pt03201          | negative                                                     | 0                                                         |
| Pt03253          | positive                                                     | 5                                                         |
| Pt02907          | positive                                                     | 3                                                         |
| Pt05447          | positive                                                     | 40                                                        |
| Pt00713          | positive                                                     | 4                                                         |
| Pt16787          | negative                                                     | 0                                                         |
| Pt00413          | negative                                                     | 0                                                         |
| Pt16692          | negative                                                     | 0                                                         |
| Pt03530          | positive                                                     | 30                                                        |
| Pt10614          | negative                                                     | 0                                                         |
| Pt08374          | positive                                                     | 20                                                        |
| Pt16572          | negative                                                     | 0                                                         |
| Pt01127          | positive                                                     | 30                                                        |
| Pt01408          | negative                                                     | 0                                                         |
| Pt15761          | negative                                                     | 0                                                         |
| Pt07162          | positive                                                     | 10                                                        |
| Pt14472          | negative                                                     | 0                                                         |
| Pt14934          | positive                                                     | 40                                                        |
| Pt16909          | negative                                                     | 0                                                         |

**Supplementary Data File S1: Genes name and statistically significant expression changes between first line sunitinib (progressive or responders) and placebo treated tumors.**

**Supplementary Data File S2: Genes name and statistically significant expression changes between second line axitinib, sorafenib, everolimus, and placebo treated tumors.**
